# Supplementary material
Source: Springer Nature journal article supplement (https://www.springermedizin.de/resource/supplementary/12889_2007_1191_MOESM1_ESM.pdf/9502654)
Supplement: MOESM1 [file 9502654]

Potential relevant studies identified by electronic and manual searches: citations or abstracts screened for retrieval (n=9226)

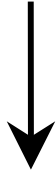

Full studies retrieved for more detailed evaluation (n=417)

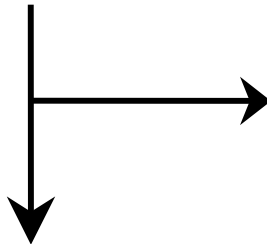

Studies excluded for not meeting inclusion criteria (n=391) or were low quality (score < 4 using critical appraisal tool) (n=1)

Selected studies included in review (n=25)
